# Supplementary material
Source: publisher figshare collection journal article supplement (https://tandf.figshare.com/ndownloader/files/13238375)
Supplement: Supplementary file 1 [file 13238375]

**Supplementary Figures**

**5’ATGACTAAGCCACGTGGTAGTACTAAGCCACGTAGTATGAATAAACTTTTAATAGCATTCGGTTTGGTAATTCTTTTTGTGACACTTCCGTGTGCATCAGAATCAGACGAAGAGTTCGATGACTCCGCAGCCGATGACACCGACGACAGCGAGGACGGAGGTGGTAGTGAAGGAGGTGATGAATATGTAACCAAAGGAGAATTTGTTGAAACTGATGGCAAAAAGAAAGAGTGCTCTTCGCACGAAGCTTGCTACGATCAACGTGAACCACAAGCGTGGTGCAGACTGAGCGAGAATCAGGCATGGACTGACAGAGGCTGCTTCTGCGAAGATAAGTTGCATTCGTGCGTCATCGAAAGAACGAACAATGGTAAATTGGAGTATTCGTACTGTGCACCTGAAGCAGGTTGGCAATGCGCATAG-3’**

1. **a)**

**Met Thr Lys Pro Arg Gly Ser Thr Lys Pro Arg Ser Met Asn Lys Leu Leu Ile Ala Phe Gly Leu Val Ile Leu Phe Val Thr Leu Pro Cys Ala Ser Glu Ser Asp Glu Glu Phe Asp Asp Ser Ala Ala Asp Asp Thr Asp Asp Ser Glu Asp Gly Gly Gly Ser Glu Gly Gly Asp Glu Tyr Val Thr Lys Gly Glu Phe Val Glu Thr Asp Gly Lys Lys Lys Glu Cys Ser Ser His Glu Ala Cys Tyr Asp Gln Arg Glu Pro Gln Ala Trp Cys Arg Leu Ser Glu Asn Gln Ala Trp Thr Asp Arg Gly Cys Phe Cys Glu Asp Lys Leu His Ser Cys Val Ile Glu Arg Thr Asn Asn Gly Lys Leu Glu Tyr Ser Tyr Cys Ala Pro Glu Ala Gly Trp Gln Cys Ala Stop**

1. **b)**

**Figure S1 a). Nucleotide sequence of alt-2 and tuftsin fusion construct b). amino acid sequence of P-TUFT-ALT-2 fusion protein. Skynlue shadow represents Tuftsin part in both cases.**


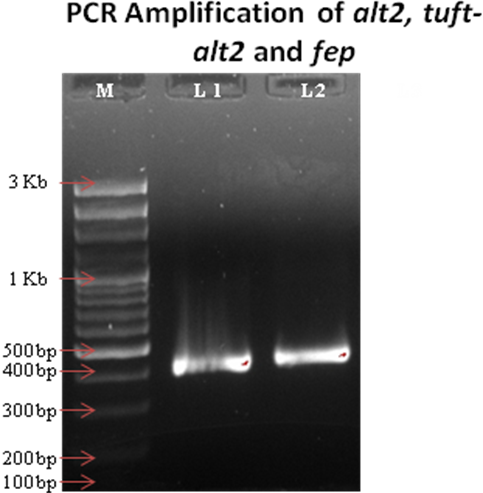


**Figure S2.** **1.7% Agarose gel of PCR amplified product:** Amplification of *alt-2* and *tuft-alt-2* by PCR using specific primers at 56°C and 58°C annealing Temerature. M: 100 bp Molecular weight marker, Lane 1: 415 bp *alt-2* , Lane 2*:* 451 bp *tuft-alt-2*


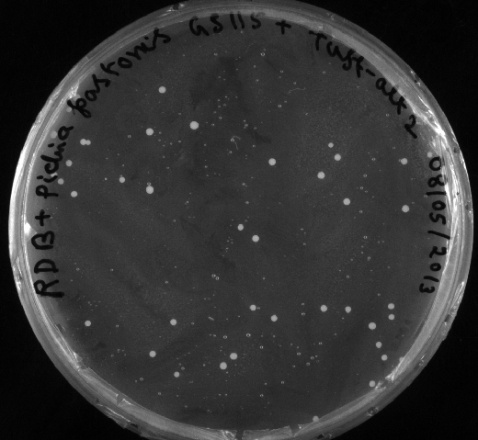

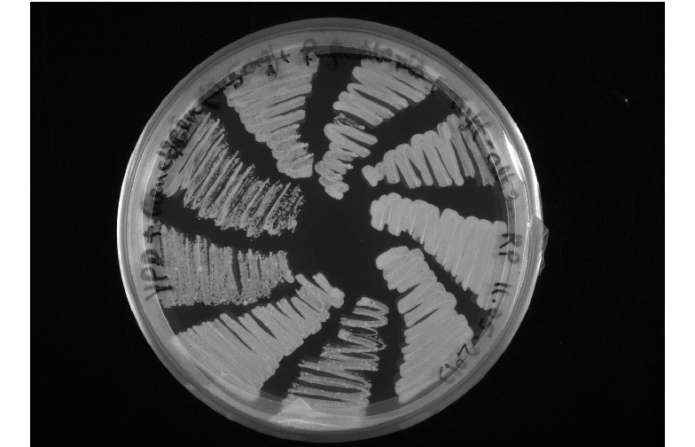


1. (b)


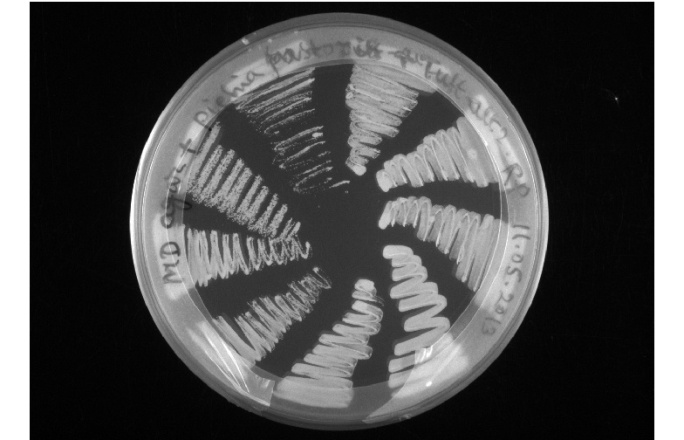

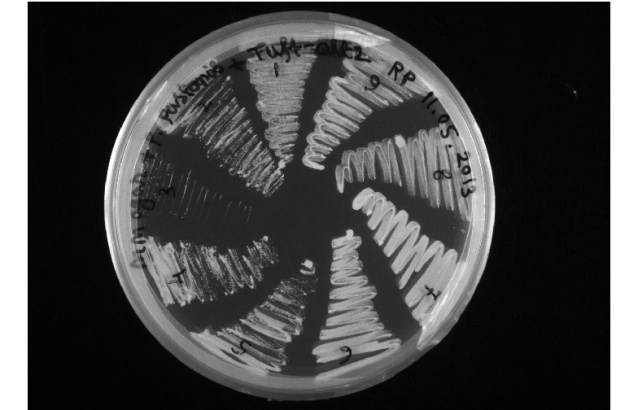


(e) (f)

**Figure S3.** **Screening of *P. pastoris* transformants**

(a) *P. pastoris/tuft-alt2* on RDB agar plate *(b) P. Pastoris/tuft-alt-2 on* YPD agar plate + Geneticin (2mg/mL) (c) *P. Pastoris/tuft-alt-2* MD agar plate (d) *P. Pastoris/tuft-alt-2 on* MM agar plate.

**1 2 3 4**

**5 6 7 8**


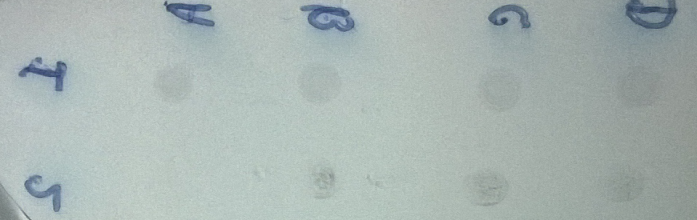


**Figure S4.** **Dot Blot Analysis for screening of Protein Expression**

**P-TUFT-ALT-2 Expression:** 1: Positive Control E-ALT-2, 2: *P. Pastoris/alt*-2 strain T20, 3: *P. Pastoris/tuft-alt*-2 strain T17, C4: *P. Pastoris/tuft-alt*-2 strain T9, 5: *P. Pastoris/tuft-alt*-2 strain T7, 6: *P. Pastoris/tuft-alt*-2 strain T3, 7: *P. Pastoris/tuft-alt*-2 strain T1, 8: *P. Pastoris/tuft-alt*-2 strain T11.
